# Supplementary material for: Conformational polymorphism of methacrylamide
Source: Royal Society of Chemistry journal article supplement (doi:10.1039/b418869a), 2005-01-01
Supplement: b418869a.pdf [file b418869a.pdf]

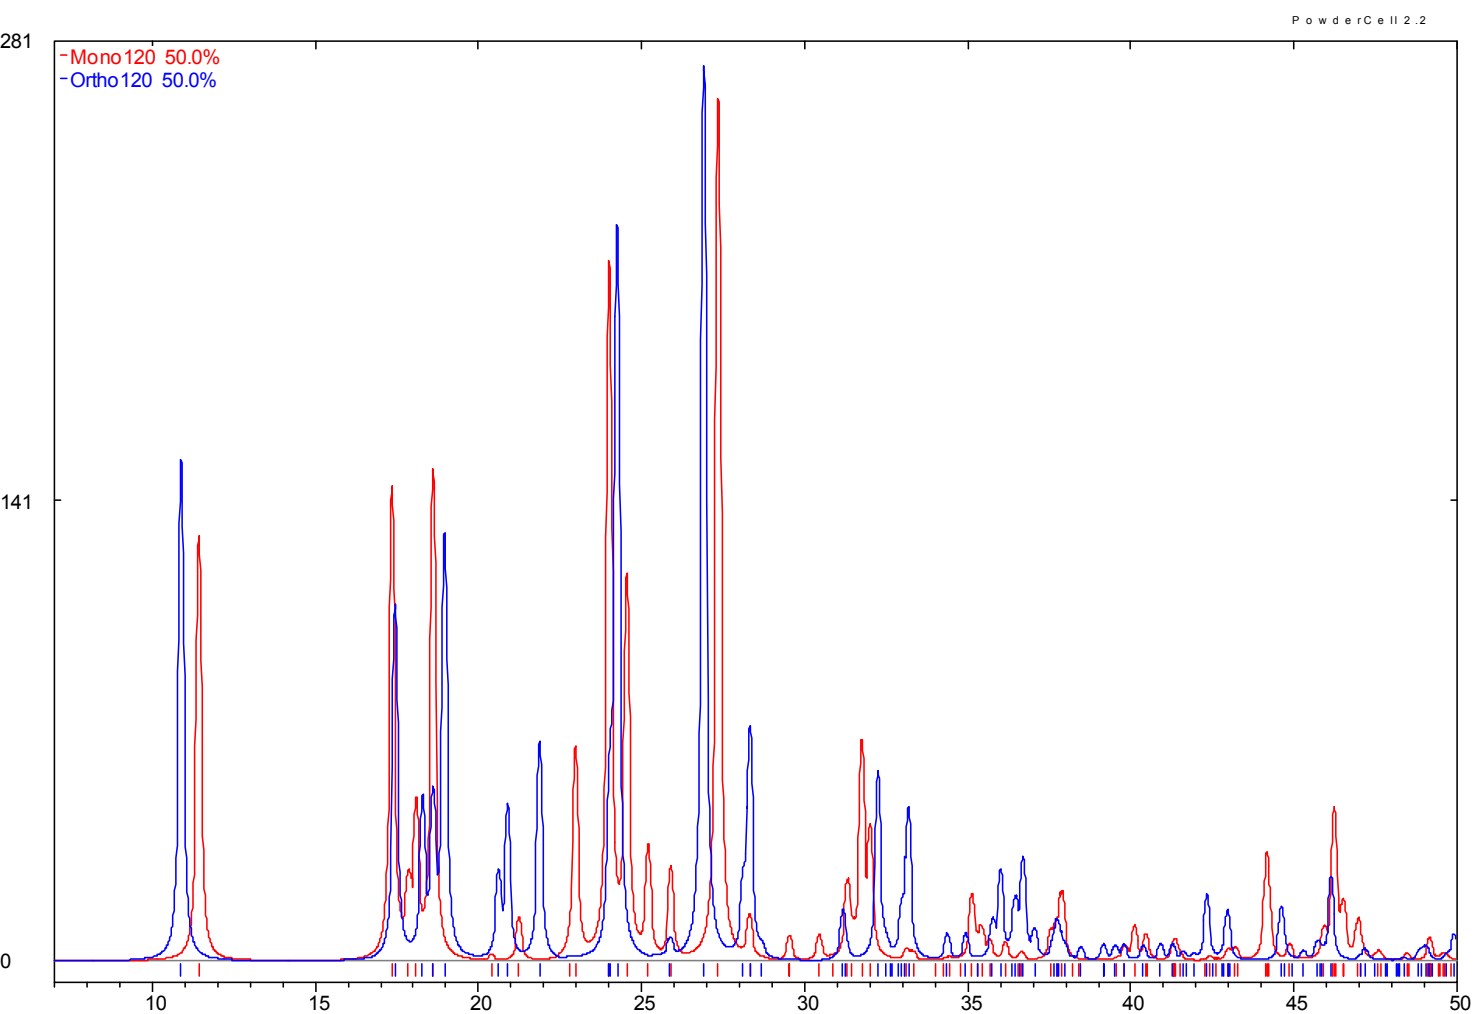

Figure 1-S. Calculated Powder Patterns of 1 (red = monoclinic, blue = orthorhombic) using 120K data

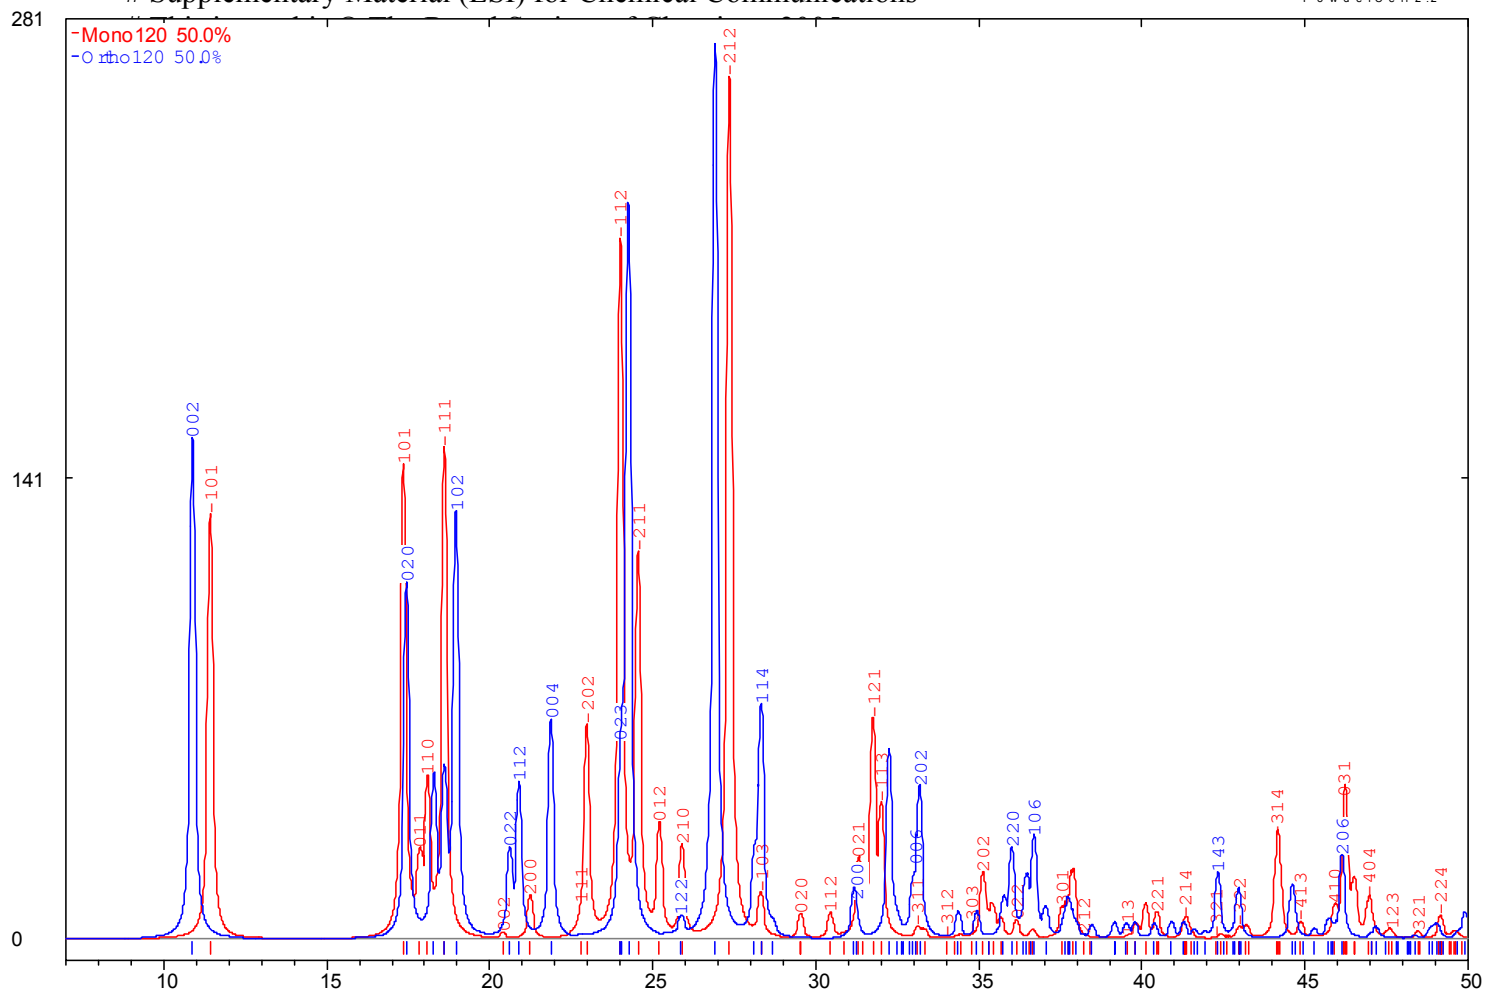

Figure 2-S. Calculated Powder Patterns of 1 (red = monoclinic, blue = orthorhombic) with indices, using 120K data

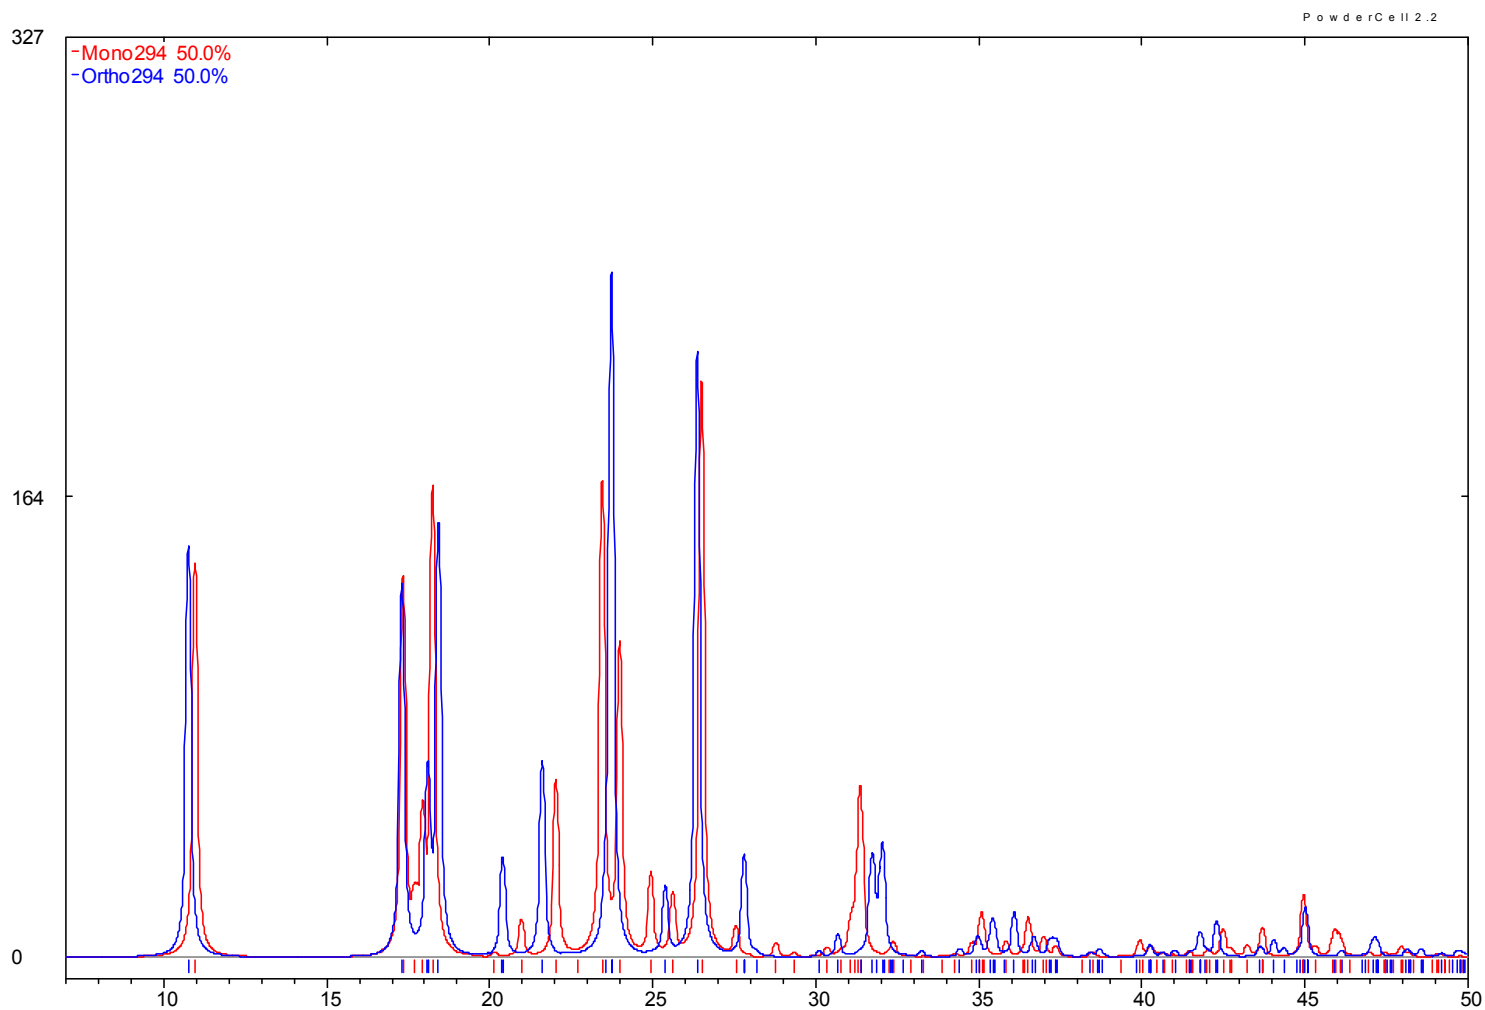

Figure 3-S. Calculated Powder Patterns of 1 (red = monoclinic, blue = orthorhombic), using 294K data

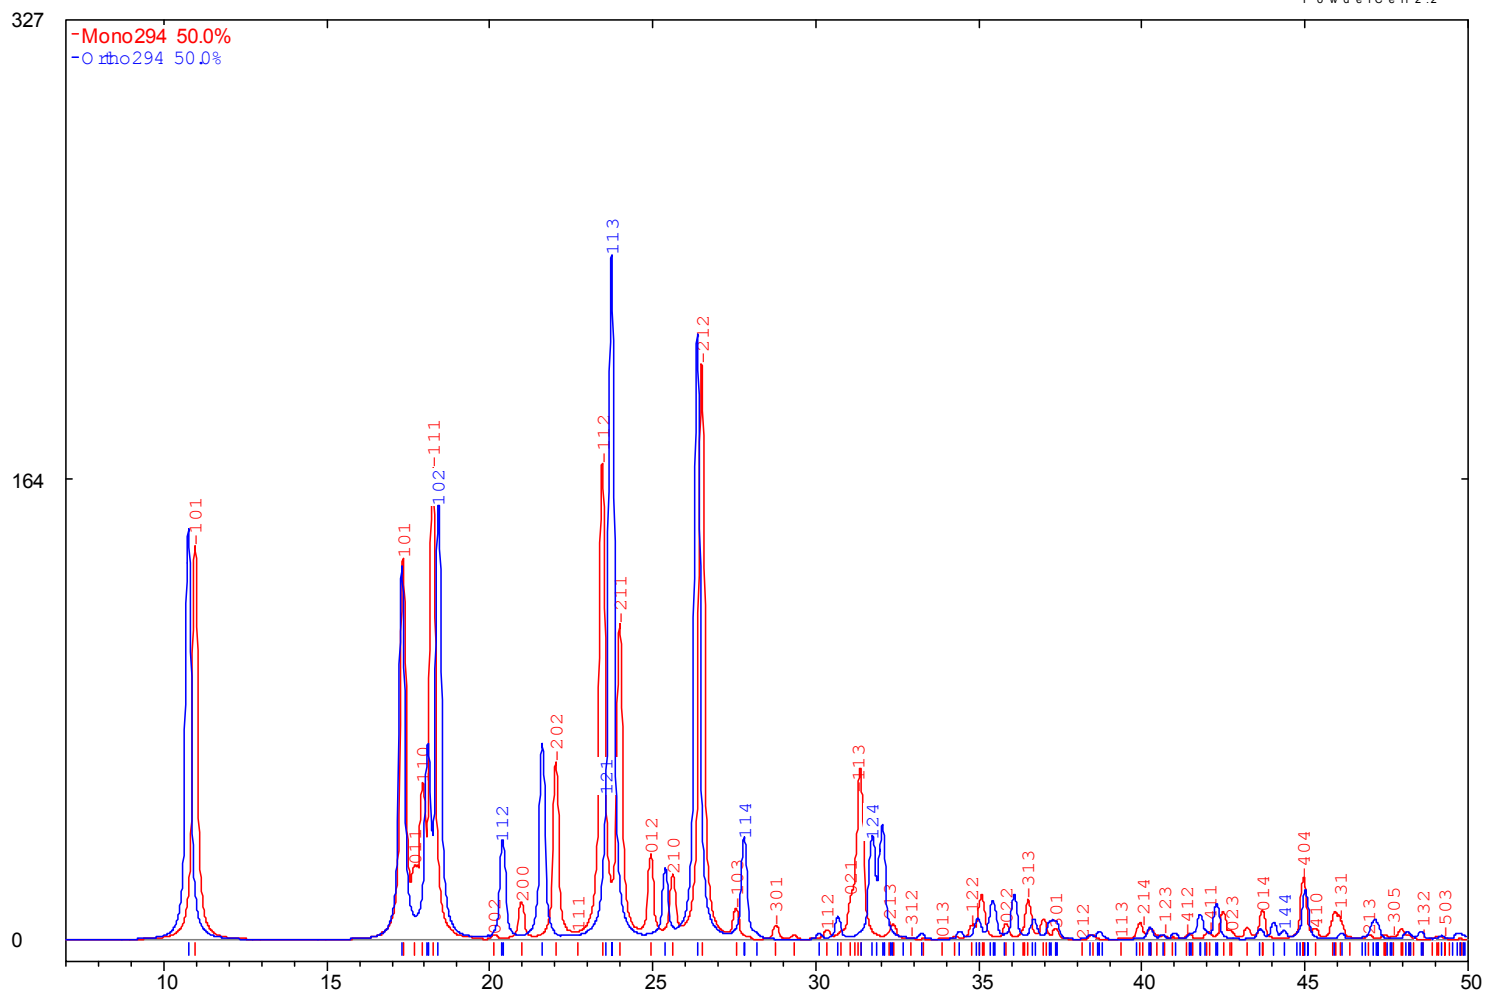

Figure 4-S. Calculated Powder Patterns of 1 (red = monoclinic, blue = orthorhombic) with indices, using 294K data

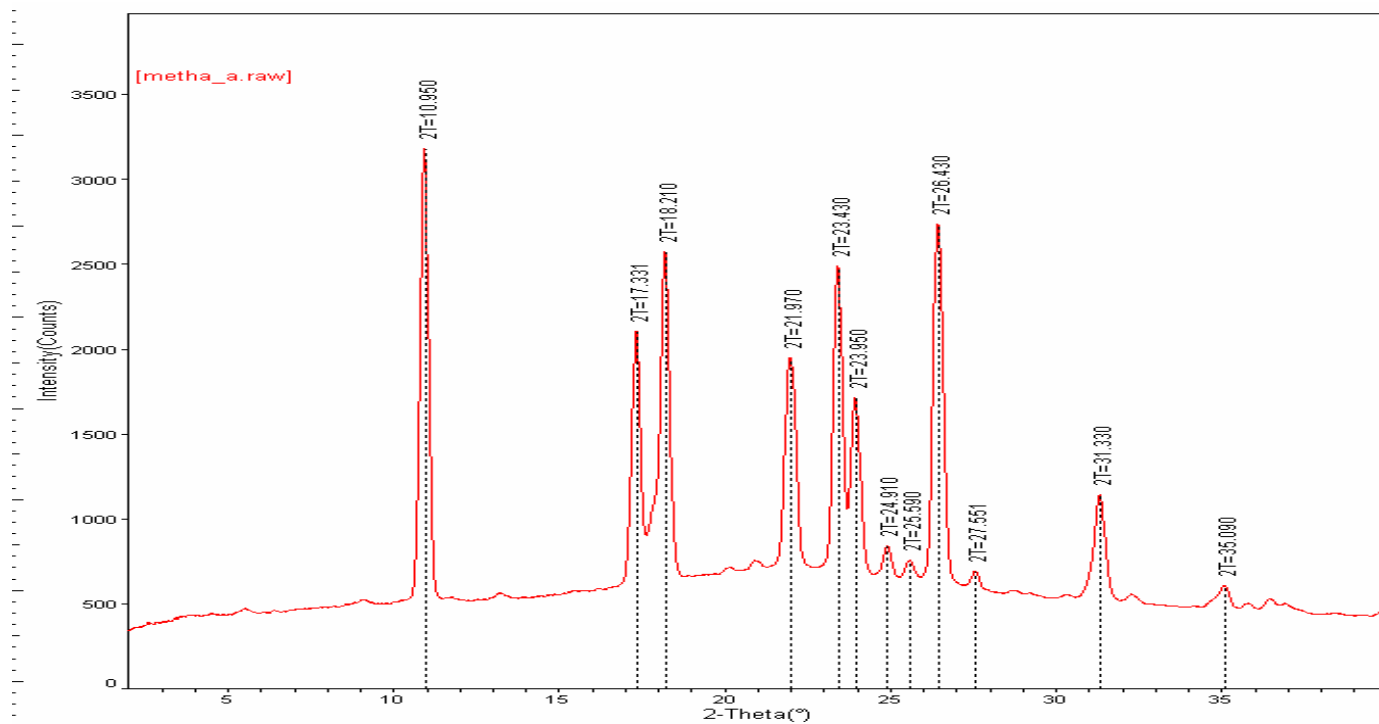

Figure S-5. Experimental Powder Diffraction Pattern of Form I

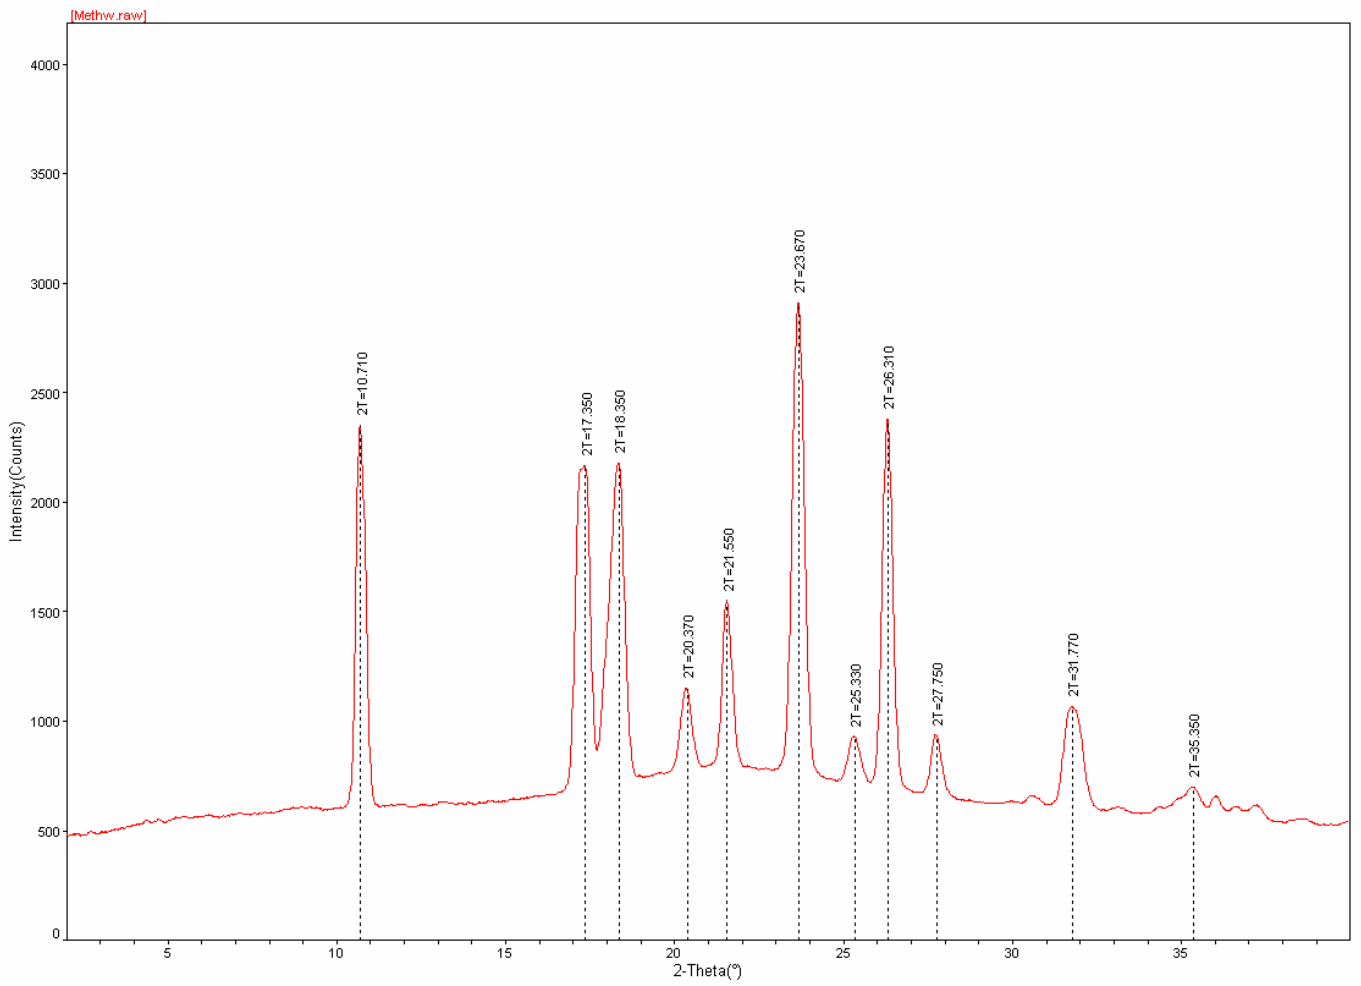

**Figure S-6. Experimental Powder Diffraction Pattern of Form II**

# Supplementary Material (ESI) for Chemical Communications  
 # This journal is © The Royal Society of Chemistry 2005

For the structure of 2-carbamoyl-1-phenyl thiolato-ethenyl acetate, (R. L. Beddoes, D. MacLeod, D. Moorcraft, P. Quayle, Y. Zhao and G. M. Davies, *Tetrahedron Lett.*, 1992, **33**, 417-420, CSD refcode KOVROC), the data in CSD *strongly suggest an incorrect structure*, with a calculated C–NH<sub>2</sub> distance of 1.197 Å and C=O distance of 1.355 Å. Switching the identity of the N and O atoms, and moving the misplaced H atoms to the “new” N atom produces a chemically appropriate structure, with an *s-cis* conformation, and a reasonable hydrogen bonding pattern compared to that derived from the published coordinates.

PLATON reports the following (not very sensible) hydrogen bond patterns for KOVROC:

```

=====
Donor --- H....Acceptor [   ARU   ]      D - H      H...A      D...A  D - H...A

N(1)  --H(2)   .. ?                0.94
N(1)  --H(3)   ..S(1) [           ]      0.95      2.03      2.8340      142
N(1)  --H(3)   ..O(2) [ 8554.01]      0.95      2.36      2.8238      110

C(11) --H(11)  ..O(1) [           ]      0.95      2.56      2.9105      102

Translation of ARU-code to Equivalent Position Code
=====
[ 8554. ] = x,1/2-y,-1/2+z
  
```

If the amide N and O atoms are simply switched, the H atoms on the “old” N atom removed, and H atoms placed in calculated positions on the “new” N atom, PLATON reports a quite reasonable H-bonding pattern:

```

=====
Donor --- H....Acceptor [   ARU   ]      D - H      H...A      D...A  D - H...A

N(2)  --H(21)  ..O(3) [ 4655.01]      0.88      2.18      3.0607      176
N(2)  --H(22)  ..O(4) [ 8555.01]      0.88      1.96      2.8238      168

C(11) --H(11)  ..O(1) [           ]      0.95      2.56      2.9105      102

Translation of ARU-code to Equivalent Position Code
=====
[ 4655. ] = 1-x,1/2+y,1/2-z
[ 8555. ] = x,1/2-y,1/2+z
  
```

The hydrogen bonds for the revised assignment are shown in the Figure on the following page:

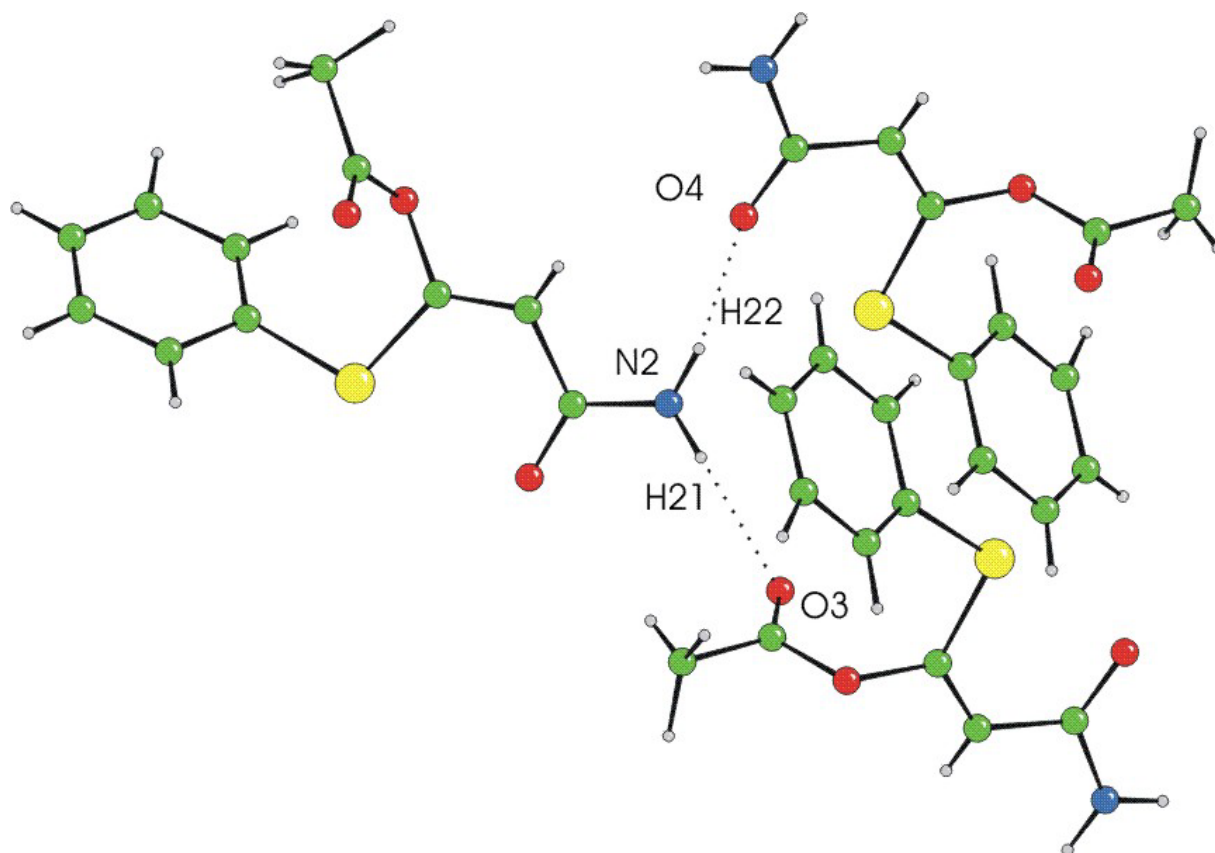

**Figure S-7.** Hydrogen bonds for the revised (*s-trans*) structure of KOVROC

A CIF file for the revised structure follows:

```
data_CRYSTALS_revised_KOVROC
_audit_creation_date      04-12-15
_audit_creation_method    CRYSTALS_ver_12.51

_oxford_structure_analysis_title 'CSD_CIF_KOVROC_revised'
_chemical_name_systematic      ?
_chemical_melting_point        ?

_cell_length_a              15.8100(10)
_cell_length_b              16.2630(10)
_cell_length_c              9.4360(10)
_cell_angle_alpha           90
_cell_angle_beta            90
_cell_angle_gamma           90
_cell_volume                 2426.2(3)

_symmetry_cell_setting      'Orthorhombic'
_symmetry_space_group_name_H-M 'P b c a '
_symmetry_space_group_name_Hall '?'
loop_
_symmetry_equiv_pos_as_xyz
  'x, y, z'
```



# Supplementary Material (ESI) for Chemical Communications  
# This journal is © The Royal Society of Chemistry 2005

```
'-x,-y,-z'  
'-x+1/2,y+1/2,z'  
'x+1/2,-y+1/2,-z'  
'x,-y+1/2,z+1/2'  
'-x,y+1/2,-z+1/2'  
'-x+1/2,-y,z+1/2'  
'x+1/2,y,-z+1/2'  
  
loop_  
_atom_type_symbol  
_atom_type_scatter_dispersion_real  
_atom_type_scatter_dispersion_imag  
_atom_type_scatter_Cromer_Mann_a1  
_atom_type_scatter_Cromer_Mann_b1  
_atom_type_scatter_Cromer_Mann_a2  
_atom_type_scatter_Cromer_Mann_b2  
_atom_type_scatter_Cromer_Mann_a3  
_atom_type_scatter_Cromer_Mann_b3  
_atom_type_scatter_Cromer_Mann_a4  
_atom_type_scatter_Cromer_Mann_b4  
_atom_type_scatter_Cromer_Mann_c  
_atom_type_scatter_source  
C      0.0033  0.0016  2.3100  20.8439  1.0200  10.2075  1.5886  0.5687  
0.8650  51.6512  0.2156 'International Tables Vol C 4.2.6.8 and 6.1.1.4'  
H      0.0000  0.0000  0.4930  10.5109  0.3229  26.1257  0.1402  3.1424  
0.0408  57.7998  0.0030 'International Tables Vol C 4.2.6.8 and 6.1.1.4'  
N      0.0061  0.0033  12.2126  0.0057  3.1322  9.8933  2.0125  28.9975  
1.1663  0.5826 -11.5290 'International Tables Vol C 4.2.6.8 and 6.1.1.4'  
O      0.0106  0.0060  3.0485  13.2771  2.2868  5.7011  1.5463  0.3239  
0.8670  32.9089  0.2508 'International Tables Vol C 4.2.6.8 and 6.1.1.4'  
S      0.1246  0.1234  6.9053  1.4679  5.2034  22.2151  1.4379  0.2536  
1.5863  56.1720  0.8669 'International Tables Vol C 4.2.6.8 and 6.1.1.4'  
  
_cell_formula_units_Z      8  
  
# Given Formula = C11 H11 N1 O3 S1  
# Dc =      1.30 Ffoo =      992.00 Mu =      2.58 M =      237.28  
# Found Formula = C11 H11 N1 O3 S1  
# Dc =      1.30 FOOO =      992.00 Mu =      2.58 M =      237.28  
  
_chemical_formula_sum      'C11 H11 N1 O3 S1'  
_chemical_formula_moiety   'C11 H11 N1 O3 S1'  
_chemical_compound_source   ?  
_chemical_formula_weight   237.28  
  
_cell_measurement_reflns_used      0  
_cell_measurement_theta_min      0  
_cell_measurement_theta_max      0  
_cell_measurement_temperature     0  
  
_exptl_crystal_description      'c'  
_exptl_crystal_colour           'colorless'  
_exptl_crystal_size_min         ?  
_exptl_crystal_size_mid         ?  
_exptl_crystal_size_max         ?  
  
_exptl_crystal_density_diffn     1.299  
_exptl_crystal_density_meas     ?  
# Non-dispersive F(000):  
_exptl_crystal_F_000           992  
_exptl_absorpt_coefficient_mu    0.258
```

# Supplementary Material (ESI) for Chemical Communications  
# This journal is © The Royal Society of Chemistry 2005

```
# Sheldrick geometric approximation 1.00 1.00
_exptl_absorpt_correction_type none
_exptl_absorpt_correction_T_min 1.0000
_exptl_absorpt_correction_T_max 1.0000
_diffn_measurement_device_type 'Unknown'
_diffn_radiation_monochromator 'graphite'
_diffn_radiation_type 'Mo K\alpha'
_diffn_radiation_wavelength 0.71073
_diffn_measurement_method \w/2\q

_computing_data_collection 'USER DEFINED DATA COLLECTION'
_computing_data_reduction 'USER DEFINED DATA REDUCTION'
_computing_cell_refinement 'USER DEFINED CELL REFINEMENT'
_computing_structure_solution 'USER DEFINED STRUCTURE SOLUTION'
_computing_structure_refinement 'CRYSTALS (Betteridge et al., 2003)'
_computing_publication_material 'CRYSTALS (Betteridge et al., 2003)'
_computing_molecular_graphics 'CAMERON (Watkin et al., 1996)'

_diffn_standards_interval_time ?
_diffn_standards_interval_count ?
_diffn_standards_number 0
_diffn_standards_decay_% ?

_diffn_ambient_temperature 0
_diffn_reflns_number 0
_reflns_number_total 0
_diffn_reflns_av_R_equivalents 0.000
# Number of reflections with Friedels Law is 0
# Number of reflections without Friedels Law is 0

_diffn_reflns_theta_min 999.000
_diffn_reflns_theta_max 0.000
_diffn_measured_fraction_theta_max NaN

_diffn_reflns_theta_full 0.000
_diffn_measured_fraction_theta_full 1.000

_diffn_reflns_limit_h_min*****
_diffn_reflns_limit_h_max*****
_diffn_reflns_limit_k_min*****
_diffn_reflns_limit_k_max*****
_diffn_reflns_limit_l_min*****
_diffn_reflns_limit_l_max*****

_oxford_diffn_Wilson_B_factor 0.00
_oxford_diffn_Wilson_scale 0.00

_atom_sites_solution_primary direct #heavy,direct,difmap,geom
#_atom_sites_solution_secondary difmap
_atom_sites_solution_hydrogens geom

_refine_diff_density_min ?
_refine_diff_density_max ?

_refine_ls_number_reflns 0
_refine_ls_number_restraints 0
_refine_ls_number_parameters 0

#_refine_ls_R_factor_ref 0.0006
```

# Supplementary Material (ESI) for Chemical Communications  
# This journal is © The Royal Society of Chemistry 2005

```
_refine_ls_wR_factor_ref          0.0000
_refine_ls_goodness_of_fit_ref     0.0000

# reflns_number_all 0
_refine_ls_R_factor_all           0.0000
_refine_ls_wR_factor_all          0.0000

# The I/u(I) cutoff below was used for refinement as
# well as the _gt R-factors:
_reflns_threshold_expression       I>0.00u(I)
_reflns_number_gt                  0
_refine_ls_R_factor_gt             0.0000
_refine_ls_wR_factor_gt            0.0000

_refine_ls_shift/su_max            0.000000

# choose from: rm (reference molecule of known chirality),
# ad (anomalous dispersion - Flack), rmad (rm and ad),
# syn (from synthesis), unk (unknown) or . (not applicable).
_chemical_absolute_configuration   '.'

_refine_ls_structure_factor_coef   F
_refine_ls_matrix_type             full
_refine_ls_hydrogen_treatment      noref          # none, undef, noref, refall,
                                                # refxyz, refU, constr or mixed

# WARNING. The IUCr will not accept Unit Weights
_refine_ls_weighting_scheme        calc
_refine_ls_weighting_details
;
Method= Quasi-Unit weights
W = 1.0 or 1./2F
;

loop_
  _atom_site_label
  _atom_site_type_symbol
  _atom_site_fract_x
  _atom_site_fract_y
  _atom_site_fract_z
  _atom_site_U_iso_or_equiv
  _atom_site_occupancy
  _atom_site_adp_type
  _atom_site_refinement_flags_posn
  _atom_site_refinement_flags_adp
  _atom_site_refinement_flags_occupancy
  _atom_site_disorder_assembly
  _atom_site_disorder_group
  _atom_site_attached_hydrogens
S1 s 0.3722 0.0756 0.0853 0.0500 1.0000 Uiso . . . . .
O1 O 0.3686 0.0244 0.3559 0.0500 1.0000 Uiso . . . . .
N2 N 0.4666 0.2960 0.3246 0.0500 1.0000 Uiso . . . . .
O3 O 0.4923 -0.0399 0.3185 0.0500 1.0000 Uiso . . . . .
O4 O 0.4447 0.2339 0.1171 0.0500 1.0000 Uiso . . . . .
C1 C 0.3927 0.0888 0.2675 0.0500 1.0000 Uiso . . . . .
C2 C 0.4222 0.1565 0.3248 0.0500 1.0000 Uiso . . . . .
C3 C 0.4457 0.2302 0.2438 0.0500 1.0000 Uiso . . . . .
C4 C 0.4245 -0.0392 0.3706 0.0500 1.0000 Uiso . . . . .
C5 C 0.3840 -0.1028 0.4640 0.0500 1.0000 Uiso . . . . .
C6 C 0.3318 -0.0264 0.0749 0.0500 1.0000 Uiso . . . . .
C7 C 0.3725 -0.0773 -0.0200 0.0500 1.0000 Uiso . . . . .
```

# Supplementary Material (ESI) for Chemical Communications  
# This journal is © The Royal Society of Chemistry 2005

```
C8 C 0.3405 -0.1553 -0.0410 0.0500 1.0000 Uiso . . . . .
C9 C 0.2720 -0.1814 0.0290 0.0500 1.0000 Uiso . . . . .
C10 C 0.2303 -0.1307 0.1210 0.0500 1.0000 Uiso . . . . .
C11 C 0.2615 -0.0526 0.1430 0.0500 1.0000 Uiso . . . . .
H1 H 0.4310 0.1560 0.4050 0.0500 1.0000 Uiso . . . . .
H4 H 0.3200 -0.1140 0.4000 0.0500 1.0000 Uiso . . . . .
H5 H 0.4020 -0.1420 0.4400 0.0500 1.0000 Uiso . . . . .
H6 H 0.3890 -0.0760 0.5700 0.0500 1.0000 Uiso . . . . .
H7 H 0.4200 -0.0590 -0.0700 0.0500 1.0000 Uiso . . . . .
H8 H 0.3550 -0.1860 -0.1100 0.0500 1.0000 Uiso . . . . .
H9 H 0.2400 -0.2290 0.0170 0.0500 1.0000 Uiso . . . . .
H10 H 0.1760 -0.1370 0.1840 0.0500 1.0000 Uiso . . . . .
H11 H 0.2380 -0.0180 0.2140 0.0500 1.0000 Uiso . . . . .
H21 H 0.4814 0.3426 0.2841 0.0600 1.0000 Uiso . . . . .
H22 H 0.4653 0.2922 0.4176 0.0600 1.0000 Uiso . . . . .
```

```
_refine_ls_extinction_method
  'None'
```

```
_oxford_refine_ls_scale 1.000
```

```
loop_
```

```
_geom_bond_atom_site_label_1
  _geom_bond_site_symmetry_1
  _geom_bond_atom_site_label_2
  _geom_bond_site_symmetry_2
  _geom_bond_distance
  _geom_bond_publ_flag
```

```
S1 . C1 . 1.763    yes
S1 . C6 . 1.780    yes
O1 . C1 . 1.392    yes
O1 . C4 . 1.368    yes
N2 . C3 . 1.355    yes
N2 . H21 . 0.880   no
N2 . H22 . 0.880   no
O3 . C4 . 1.179    yes
O4 . C3 . 1.197    yes
C1 . C2 . 1.312    yes
C2 . C3 . 1.469    yes
C2 . H1 . 0.769    no
C4 . C5 . 1.502    yes
C5 . H4 . 1.192    no
C5 . H5 . 0.734    no
C5 . H6 . 1.094    no
C6 . C7 . 1.379    yes
C6 . C11 . 1.353   yes
C7 . C8 . 1.380    yes
C7 . H7 . 0.935    no
C8 . C9 . 1.338    yes
C8 . H8 . 0.852    no
C9 . C10 . 1.367   yes
C9 . H9 . 0.932    no
C10 . C11 . 1.378   yes
C10 . H10 . 1.049   no
C11 . H11 . 0.951   no
```

```
loop_
```

```
_geom_angle_atom_site_label_1
  _geom_angle_site_symmetry_1
  _geom_angle_atom_site_label_2
  _geom_angle_site_symmetry_2
  _geom_angle_atom_site_label_3
  _geom_angle_site_symmetry_3
  _geom_angle
  _geom_angle_publ_flag
```

```
C1 . S1 . C6 . 103.487    yes
```

# Supplementary Material (ESI) for Chemical Communications  
# This journal is © The Royal Society of Chemistry 2005

|                           |     |
|---------------------------|-----|
| C1 . O1 . C4 . 116.932    | yes |
| C3 . N2 . H21 . 120.000   | no  |
| C3 . N2 . H22 . 120.000   | no  |
| H21 . N2 . H22 . 120.000  | no  |
| S1 . C1 . O1 . 116.263    | yes |
| S1 . C1 . C2 . 124.709    | yes |
| O1 . C1 . C2 . 118.791    | yes |
| C1 . C2 . C3 . 124.053    | yes |
| C1 . C2 . H1 . 117.426    | no  |
| C3 . C2 . H1 . 118.326    | no  |
| C2 . C3 . N2 . 114.409    | yes |
| C2 . C3 . O4 . 123.859    | yes |
| N2 . C3 . O4 . 121.702    | yes |
| O1 . C4 . O3 . 123.533    | yes |
| O1 . C4 . C5 . 107.748    | yes |
| O3 . C4 . C5 . 128.708    | yes |
| C4 . C5 . H4 . 99.773     | no  |
| C4 . C5 . H5 . 104.582    | no  |
| H4 . C5 . H5 . 92.297     | no  |
| C4 . C5 . H6 . 103.374    | no  |
| H4 . C5 . H6 . 125.823    | no  |
| H5 . C5 . H6 . 126.883    | no  |
| S1 . C6 . C7 . 115.326    | yes |
| S1 . C6 . C11 . 124.202   | yes |
| C7 . C6 . C11 . 120.189   | yes |
| C6 . C7 . C8 . 118.296    | yes |
| C6 . C7 . H7 . 120.742    | no  |
| C8 . C7 . H7 . 120.952    | no  |
| C7 . C8 . C9 . 121.171    | yes |
| C7 . C8 . H8 . 123.355    | no  |
| C9 . C8 . H8 . 114.160    | no  |
| C8 . C9 . C10 . 120.845   | yes |
| C8 . C9 . H9 . 130.037    | no  |
| C10 . C9 . H9 . 108.452   | no  |
| C9 . C10 . C11 . 118.618  | yes |
| C9 . C10 . H10 . 134.076  | no  |
| C11 . C10 . H10 . 107.306 | no  |
| C10 . C11 . C6 . 120.850  | yes |
| C10 . C11 . H11 . 120.784 | no  |
| C6 . C11 . H11 . 118.003  | no  |

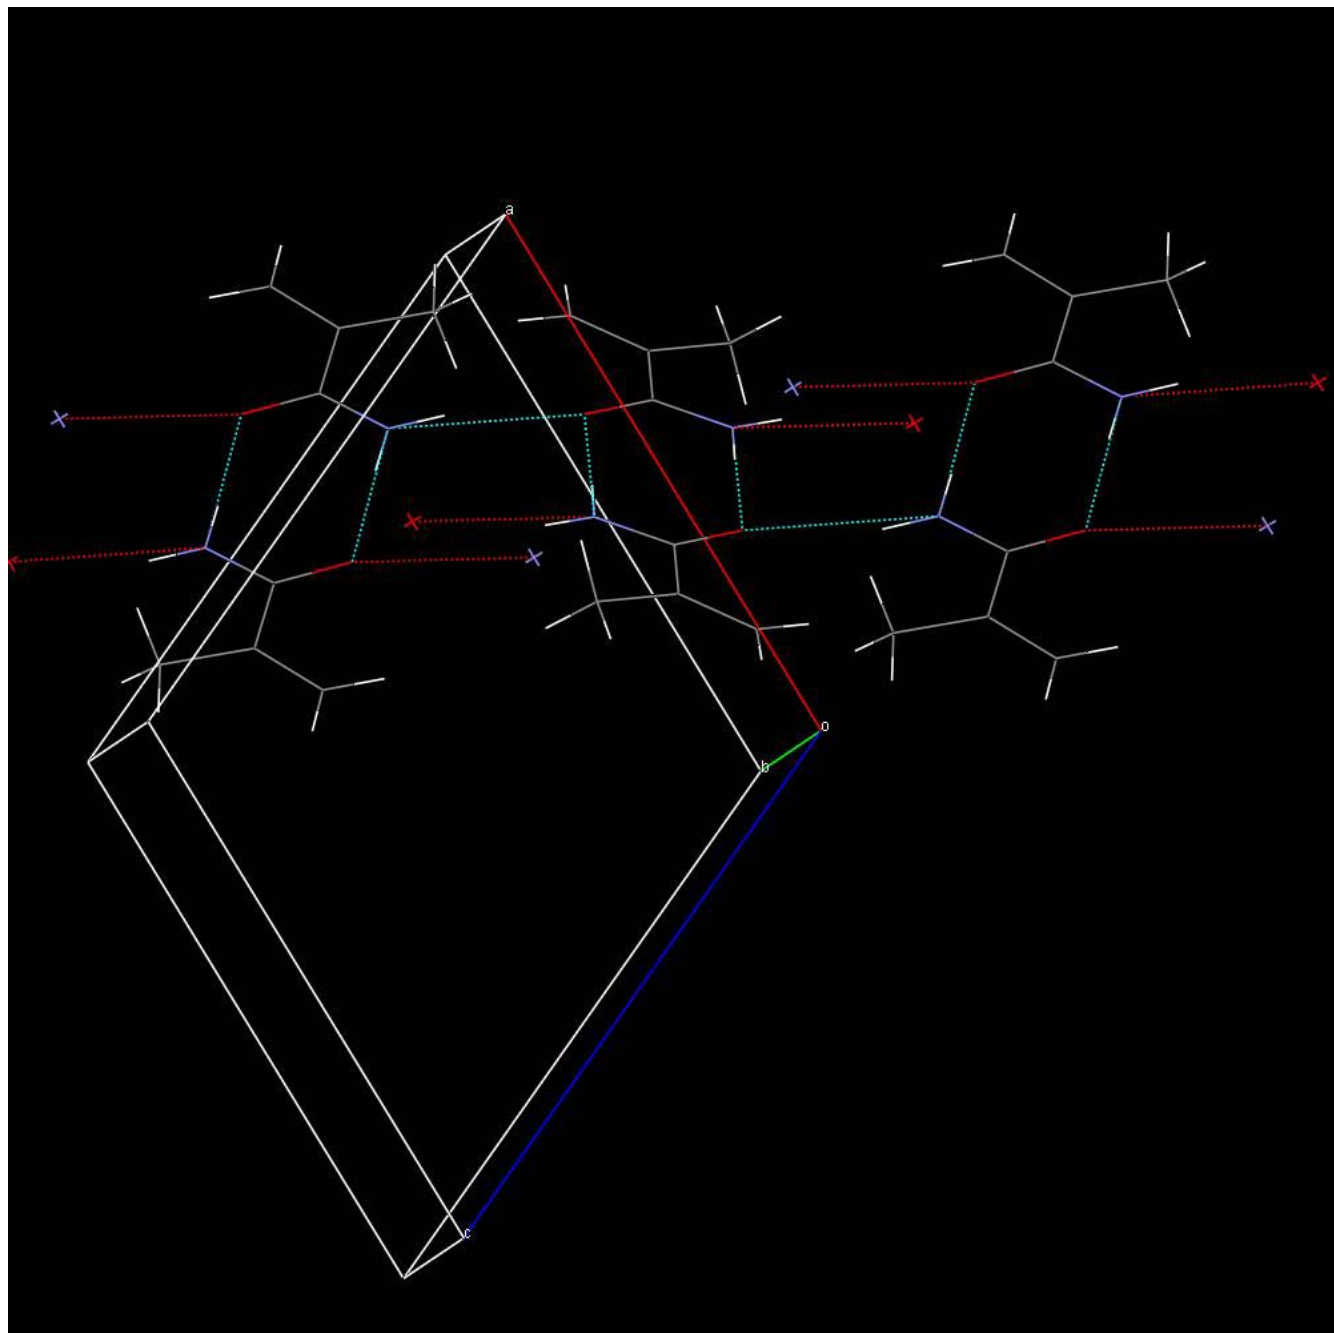

**Figure 8-S. Packing Diagram of Form I showing spiralling nature of C(4) chains along  $2_1$  axis (upper and lower chains are truncated for clarity).**

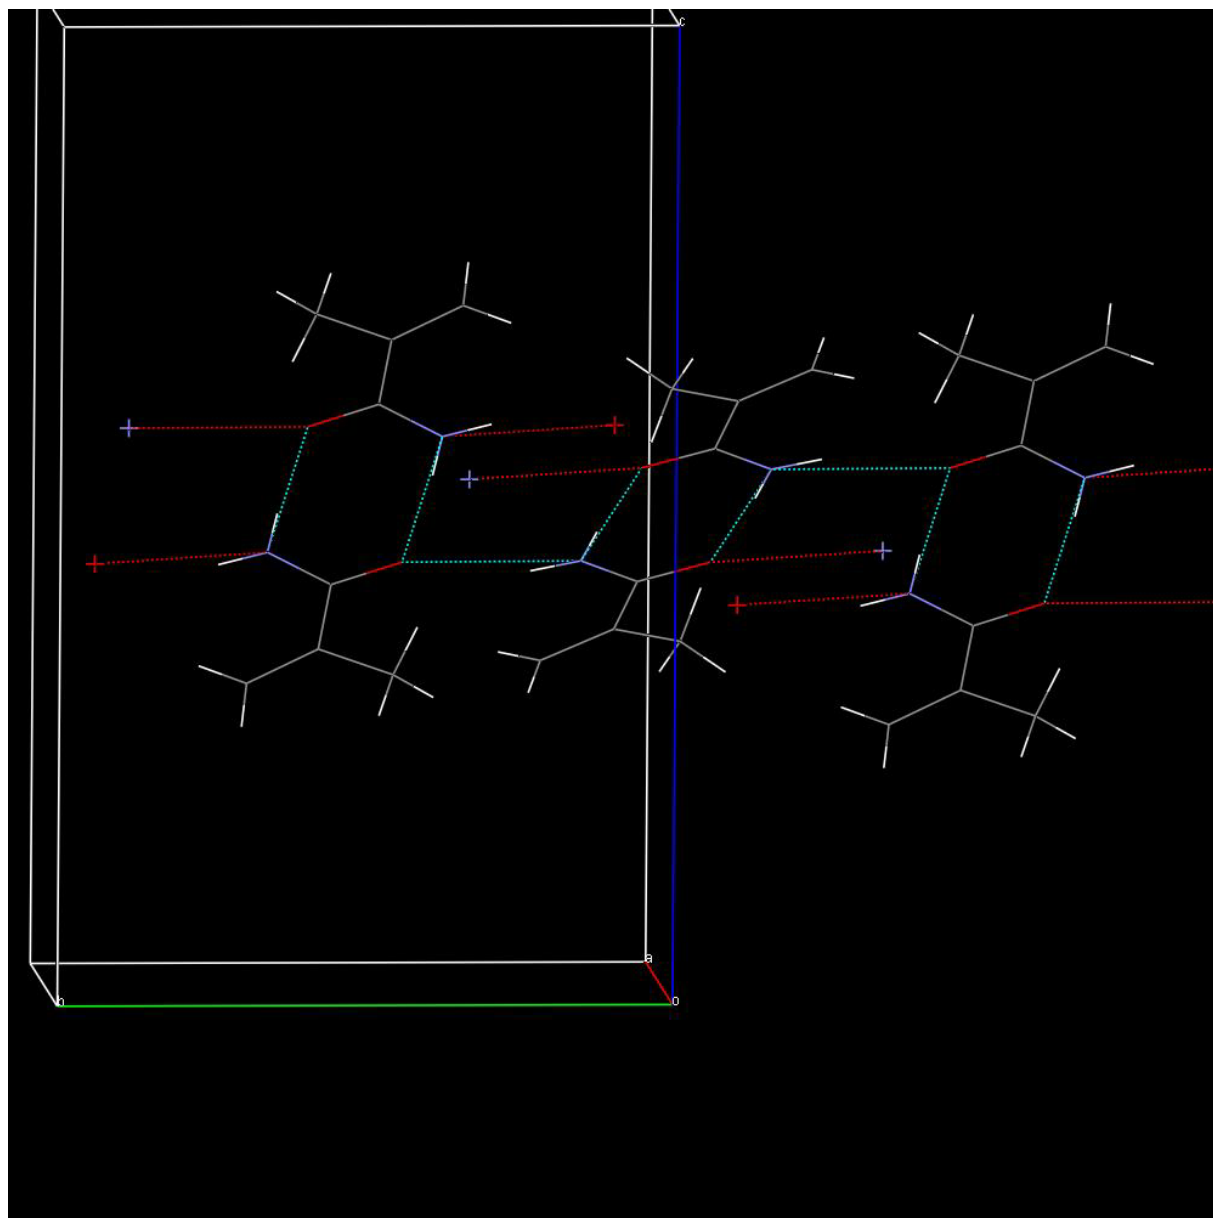

**Figure 9-S. Packing Diagram for Form II showing spiralling nature of C(4) chains along  $2_1$  axis (upper and lower chains are truncated for clarity).**
